# Supplementary material for: Fate of adipocyte progenitors during adipogenesis in mice fed a high-fat diet
Source: PubMed Central journal article supplement (PMC8495176; doi:10.1016/j.molmet.2021.101328), 2021-09-23
Supplement: mmc2.pdf [file mmc2.pdf]

**TABLE 1**

| <b>REAGENT or RESOURCE</b>                                | <b>SOURCE</b>               | <b>IDENTIFIER</b>                 |
|-----------------------------------------------------------|-----------------------------|-----------------------------------|
| <b>Antibodies</b>                                         |                             |                                   |
| Anti-GFP guinea-pig polyclonal antibody                   | Frontier Institute Co. Ltd. | Cat#GFP-GP-Af1180                 |
| Anti-rabbit perilipin                                     | Santa Cruz Biotechnology    | Cat#Sc-67164                      |
| Anti-goat td-tomato polyclonal antibody                   | SICGEN Antibodies           | Cat#AB8181-200                    |
| Anti-RFP rabbit monoclonal antibody                       | Rockland                    | Cat#200-301-379                   |
| Anti-rabbit Ki67 antibody                                 | Abcam                       | Cat#ab15580                       |
| APC anti-mouse CD140 $\alpha$                             | BioLegend                   | Cat#135907<br>(Clone: APA5)       |
| APC anti-mouse IgG2a, $\kappa$ isotype control            | eBioscience                 | Cat#17-4724-81                    |
| APC/Cy7 anti-mouse Ly-6A/E (Sca-1)                        | BioLegend                   | Cat#108125<br>(Clone: D7)         |
| APC/Cy7 anti-mouse IgG2b $\kappa$ isotype control         | BioLegend                   | Cat#400523                        |
| PE-Cy7 anti-mouse CD31                                    | eBioscience                 | Cat#25-0311-81<br>(Clone: 390)    |
| PE-Cy7 anti-mouse IgG2a, $\kappa$ isotype control         | eBioscience                 | Cat#25-4031-81                    |
| PE-Cy7 anti-mouse CD45                                    | eBioscience                 | Cat#25-0451-82<br>(Clone: 30-F11) |
| Anti-mouse Purified rat CD16/CD32                         | BD Biosciences              | Cat#553141                        |
| 7-AAD (PerCP-Cy5.5)                                       | BD Biosciences              | Cat#559925                        |
| Alexa Fluor® 488 conjugate goat anti-guinea pig IgG (H+L) | Life technologies           | Cat#A11073                        |
| Alexa Fluor® 488 conjugate donkey anti-rabbit IgG (H+L)   | Life technologies           | Cat#A21206                        |
| Alexa Fluor® 568 conjugate donkey anti-goat IgG (H+L)     | Life Technologies           | Cat#A11057                        |
| Alexa Fluor® 555 conjugate goat anti-rabbit IgG (H+L)     | Cell signaling              | Cat#4413                          |
| DAPI                                                      | Molecular Probes            | Cat#D1306                         |
| <b>Chemicals, Peptides, and Recombinant Proteins</b>      |                             |                                   |
| Tamoxifen                                                 | Sigma-Aldrich               | Cat#T5648                         |
| Sunflower oil                                             | Fujifilm Wako Chemicals     | Cat#196-15265                     |
| Collagenase from <i>Clostridium histolyticum</i>          | Sigma-Aldrich               | Cat#C6885-1G                      |

|                                                          |                                     |                                                                                         |
|----------------------------------------------------------|-------------------------------------|-----------------------------------------------------------------------------------------|
| Bovine serum albumin                                     | Sigma-Aldrich                       | Cat#A8022-100G                                                                          |
| BD Pharm lyse lysing buffer                              | BD Biosciences                      | Cat#555899                                                                              |
| PBS(-)                                                   | Nacalai tesque                      | Code 14249-24                                                                           |
| DAKO real antibody diluent                               | DAKO                                | Ref# S2022                                                                              |
| Normal goat serum                                        | Vector Laboratories                 | Ref# S-1000                                                                             |
| Fetal bovine serum (FBS)                                 | Gibco                               | Ref# 10437-028                                                                          |
| Ethanol (99.5%)                                          | Fujifilm WAKO Chemicals.            | Cat#057-00456                                                                           |
| 4% Paraformaldehyde phosphate buffer solution            | Fujifilm WAKO Chemicals.            | Cat#163-20145<br>Lot# SKH3491                                                           |
| Direct PCR (Tail)                                        | Viagen Biotech Incorporation        | Cat#102-T                                                                               |
| Proteinase K, recombinant PCR grade                      | Roche Diagnostics                   | Cat#03115828001<br>Lot# 48602000                                                        |
| TKS Gflex™ DNA polymerase                                | Takara                              | Cat# R060A                                                                              |
| Ethidium bromide                                         | Invitrogen                          | Cat#15585-011                                                                           |
| Agarose S gel                                            | Nippon Gene                         | Cat#312-01193                                                                           |
| <b>Critical Commercial Assays</b>                        |                                     |                                                                                         |
| Click iT® EdU Alex Flour® 555 Imaging Kit                | Molecular Probes                    | Ref#C10338                                                                              |
| Isogen                                                   | NIPPON GENE                         | Code#311-02501<br>Lot#26000K                                                            |
| RNeasy mini kit (250)                                    | Qiagen                              | Cat#74106                                                                               |
| TB Green Premix Ex Taq™ II (Tli RNaseH Plus)             | TAKARA                              | Cat#RR820A<br>Lot#AK31127A                                                              |
| New hematoxylin solution                                 | Muto Pure chemicals Co, limited     | Lot# 131209                                                                             |
| New eosin solution                                       | Muto Pure chemicals Co, limited     | Lot# 131028                                                                             |
| β-Mercaptoethanol                                        | Gibco                               | Cat#21985-023                                                                           |
| <b>Experimental Models: Organisms/Strains</b>            |                                     |                                                                                         |
| PDGFRα-GFP-Cre-ER <sup>T2</sup> knock-in mice            | (Miwa and Era, 2015)                | RIKEN BRC<br>(Tsukuba, Japan)                                                           |
| B6.Cg-Gt(ROSA)26Sor <sup>tm9(CAG-td-Tomato)</sup> Hze /J | Dr. Koichi Ikuta (Kyoto University) | N/A                                                                                     |
| <b>Software and Algorithms</b>                           |                                     |                                                                                         |
| FlowJo version 8                                         | FlowJo                              | <a href="https://www.flowjo.com/">https://www.flowjo.com/</a>                           |
| ystat2004                                                | ystat2004.xls for Windows           | Igaku Tosho Shuppan Co., Ltd, Tokyo, Japan                                              |
| ImageJ Software 11.53a                                   | National Institute of Health, USA   | <a href="https://imagej.nih.gov/ij/notes.html">https://imagej.nih.gov/ij/notes.html</a> |
| <b>Other</b>                                             |                                     |                                                                                         |
| Normal chow (NC) diet                                    | CLEA, Japan                         | CE-2                                                                                    |
| HFD (60% KCAL Fat)                                       | Research Diets                      | Cat# D12492<br>Lot# 20120201                                                            |

|               |         |                            |
|---------------|---------|----------------------------|
| Tf2b          | Forward | TGGAGATTTGTCCACCATGA       |
|               | Reverse | GAATTGCCAAACTCATCAAAACT    |
| tdTomato      | Forward | ATGGTGAGCAAGGGCGAGGAGGTCA  |
|               | Reverse | TCGAACTCGTGGCCGTTTCATGGAGC |
| Pdgfra        | Forward | AGCAGGCAGGGCTTCAACGG       |
|               | Reverse | ACACAGTCTGGCGTGCGTCC       |
| Dpp4          | Forward | TTGTGGATAGCAAGCGAGTTG      |
|               | Reverse | CACAGCTATTCCGCACTTGAA      |
| Pi16          | Forward | TGGATCTTCACAACCAGTACCG     |
|               | Reverse | CAGCTCGTCATCCCACCTC        |
| Icam1         | Forward | GTGATGCTCAGGTATCCATCCA     |
|               | Reverse | CACAGTTCTCAAAGCACAGCG      |
| Ppar $\gamma$ | Forward | TTTCCGAAGAACCATCCGATT      |
|               | Reverse | ATGGCATTGTGAGACATCCCC      |
| Tnf $\alpha$  | Forward | ACGGCATGGATCTCAAAGAC       |
|               | Reverse | AGATAGCAATCGGCTGACG        |
| Cd11c         | Forward | TGTTTGAGTGTCAGGAGCAGG      |
|               | Reverse | AGGTCACCTAGTTGGGTCTTG      |
| Mcp1          | Forward | CATCCACGTGTTGGCTCA         |
|               | Reverse | GATCATCTTGCTGGTGAATGAGT    |
| iNos          | Forward | CAGCTGGGCTGTACAAACCTT      |
|               | Reverse | CATTGGAAGTGAAGCGTTTCG      |
